# Supplementary figures and images for: In Vitro Functionality and Endurance of GMP-Compliant Point-of-Care BCMA.CAR-T Cells at Different Timepoints of Cryopreservation
Source: MDPI journal article supplement (doi:10.3390/ijms25031394), 2024-01-23

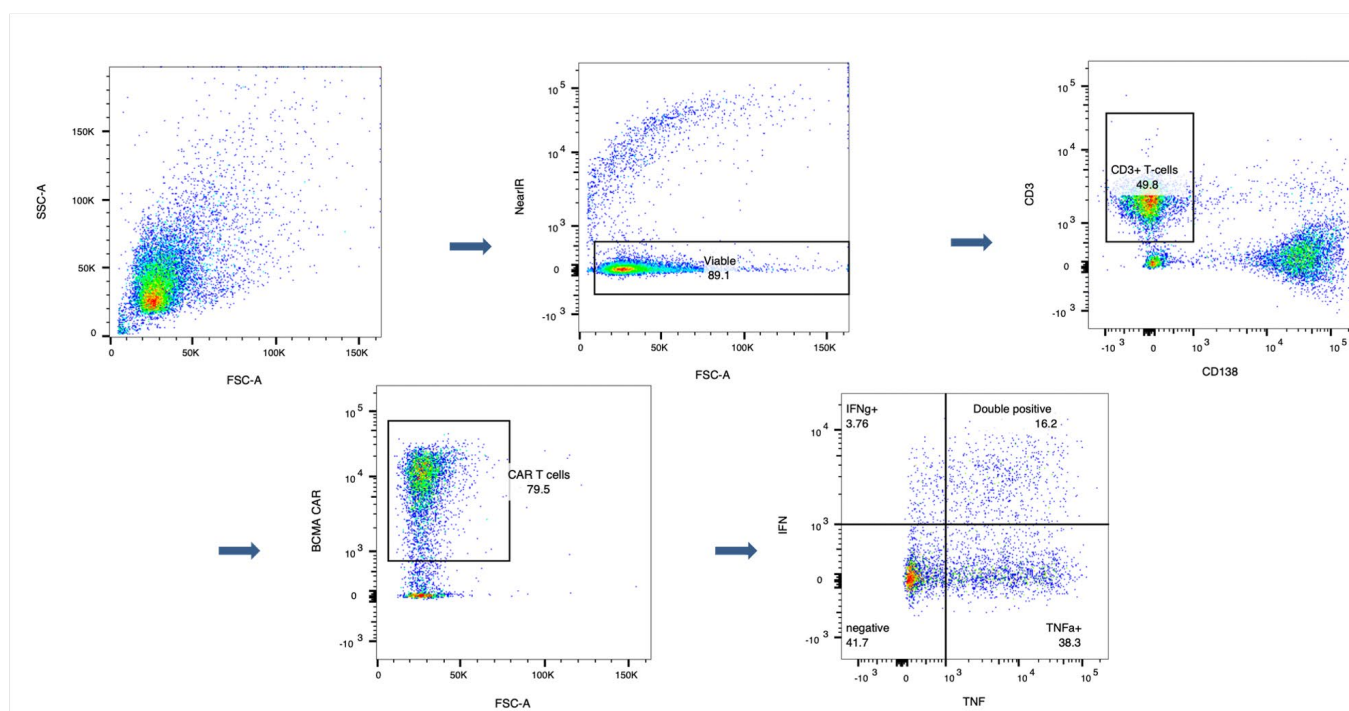

**Figure S1.** Gating strategy of ICS for detecting TNF- $\alpha$ - and IFN- $\gamma$ - producing cells.

Supplement: s1 [file s1]
